# Supplementary material for: Improved phase stability of γ-CsPbI3 perovskite nanocrystals using the interface effect using iodine modified graphene oxide
Source: Royal Society of Chemistry journal article supplement (doi:10.1039/c9tc06465f), 2020-01-01
Supplement: c9tc06465f1.pdf [file c9tc06465f1.pdf]

Supporting information for

## Improved Phase Stability of $\gamma$ -CsPbI<sub>3</sub> Perovskite Nanocrystals by Interface Effect using Iodine Modified Graphene Oxide

Qi Zhang<sup>1</sup>, Yangying Zhou<sup>1</sup>, Yaxuan Wei<sup>1</sup>, Meiqian Tai<sup>1</sup>, Hui Nan<sup>1</sup>, Youchen Gu<sup>1</sup>, Jianhua Han<sup>1</sup>,  
Xuewen Yin<sup>1</sup>, Jianbao Li<sup>2,1</sup> and Hong Lin<sup>1\*</sup>

<sup>1</sup> State Key Laboratory of New Ceramics & Fine Processing, School of Materials Science and Engineering, Tsinghua University, Beijing 100084, China

<sup>2</sup> State Key Laboratory of Marine Resource Utilization in South China Sea, Materials and Chemical Engineering Institute, Hainan University, Haikou 570228, China

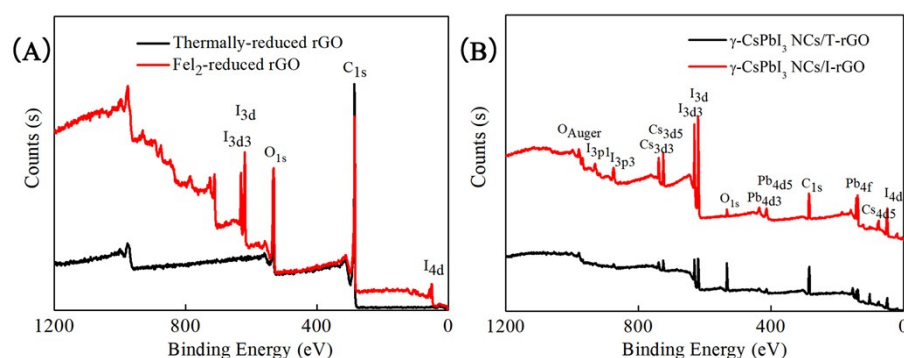

**Figure S1.** XPS spectra of (A) thermally-reduced rGO (T-rGO) and FeI<sub>2</sub>-reduced rGO (I-rGO) and (B)  $\gamma$ -CsPbI<sub>3</sub> NCs/T-rGO and  $\gamma$ -CsPbI<sub>3</sub> NCs/I-rGO heterostructures.

**Table S1.** Element contents derived from the corresponding XPS spectra of thermally-reduced rGO, FeI<sub>2</sub>-reduced rGO,  $\gamma$ -CsPbI<sub>3</sub> NCs/T-rGO and  $\gamma$ -CsPbI<sub>3</sub> NCs/I-rGO heterostructures.

|       | Thermally-reduced<br>rGO, Atomic % | FeI <sub>2</sub> -reduced<br>rGO, Atomic % | $\gamma$ -CsPbI <sub>3</sub> NCs/T-rGO,<br>Atomic % | $\gamma$ -CsPbI <sub>3</sub> NCs/I-rGO,<br>Atomic % |
|-------|------------------------------------|--------------------------------------------|-----------------------------------------------------|-----------------------------------------------------|
| C1s   | 84.47                              | 72.36                                      | 64.68                                               | 66.33                                               |
| N1s   | 0.84                               | 0.95                                       | 3.84                                                | 2.79                                                |
| O1s   | 14.52                              | 20.69                                      | 25.45                                               | 8.48                                                |
| Fe2p  | 0.18                               | 4.59                                       | -                                                   | -                                                   |
| I3d   | -                                  | 1.41                                       | 3.84                                                | 14.81                                               |
| Pb 4f | -                                  | -                                          | 1.2                                                 | 3.53                                                |
| Cs 3d | -                                  | -                                          | 0.99                                                | 4.05                                                |

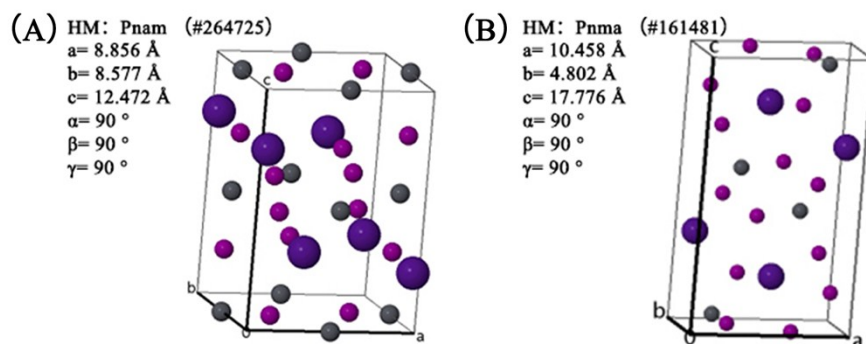

**Figure S2.** Schematic and structural parameters of  $\gamma$ -CsPbI<sub>3</sub> (ICSD #264725) and  $\delta$ -CsPbI<sub>3</sub> (ICSD #161480).

As the formation of  $\gamma$ -CsPbI<sub>3</sub> NCs can be described as that Cs-oleate, Pb-oleate and iodine-organic amine (such as oleylammonium iodine (OAmI)) precursors grow through self-assembly and oriented attachment into NCs, OAmI precursors can act as a fundamental unit to assemble  $\gamma$ -CsPbI<sub>3</sub> NCs and manipulate the phase structure, morphology and crystals size of NCs. This variation can also be described by the different crystal structure of  $\gamma$ -CsPbI<sub>3</sub> and  $\delta$ -CsPbI<sub>3</sub>, which is shown in **Figure S2**. The standard  $\gamma$ -CsPbI<sub>3</sub> outlines an atomic ratio of Cs:Pb:I with 1:1:3, but exceed amount of Pb-oleate or OAmI could destroy this pseudo-cubic phase structure and give rise to the formation of  $\delta$ -CsPbI<sub>3</sub>.

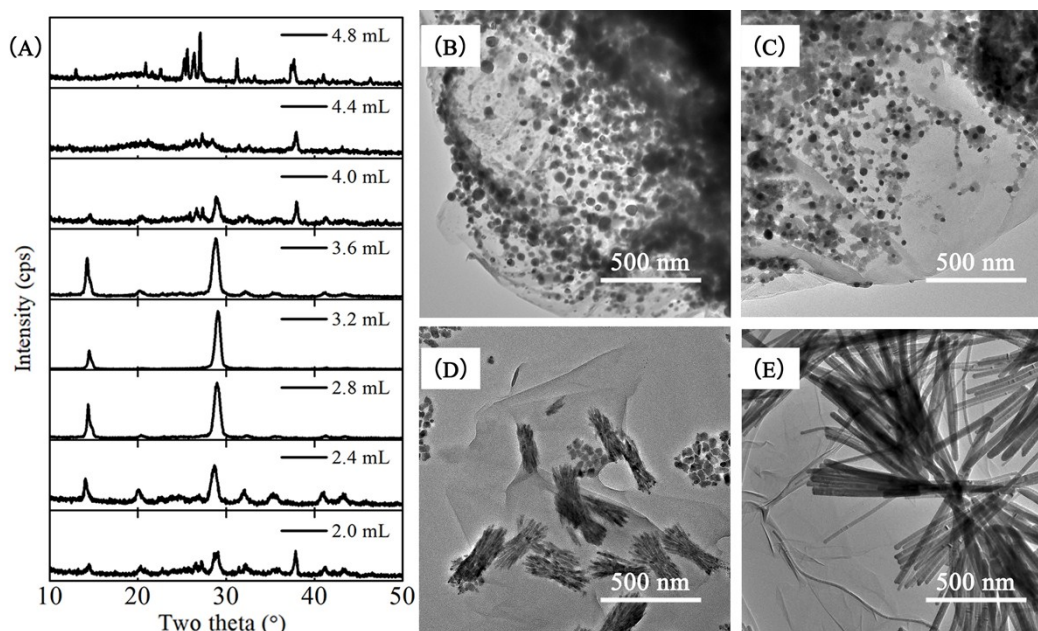

**Figure S3.** Structure and morphology of  $\gamma$ -CsPbI<sub>3</sub> NCs/rGO heterostructures with varying OAm added amounts. (A) XRD patterns of  $\gamma$ -CsPbI<sub>3</sub> NCs/rGO heterostructures with varying OAm

added amounts ranging from 2.0 to 2.4, 2.8, 3.2, 3.6, 4.0, 4.4, and 4.8 mL. (B-E) TEM images of  $\gamma$ -CsPbI<sub>3</sub> NCs/rGO heterostructures with OAm added amounts of (B) 2.0, (C) 2.8, (D) 4.0, and (E) 4.8 mL. The optimized OAm added amounts were 2.8-3.6 mL.

For OAm added amount essentially produces a large amount of OAmI precursors and then participate in the formation of  $\gamma$ -CsPbI<sub>3</sub> NCs, it is necessary to control OAm added amounts. The structure and morphology of  $\gamma$ -CsPbI<sub>3</sub> NCs/rGO heterostructures with varying OAm amounts are shown in **Figure S3**. Within the range of 2.4-3.6 mL, these  $\gamma$ -CsPbI<sub>3</sub> NCs showed only the (020) and (040) diffraction peaks in the XRD patterns (see **Figure S3(A)**) and a regular cubic-shape and a well-distribution on the surface of rGO (see **Figure S3(C)**).

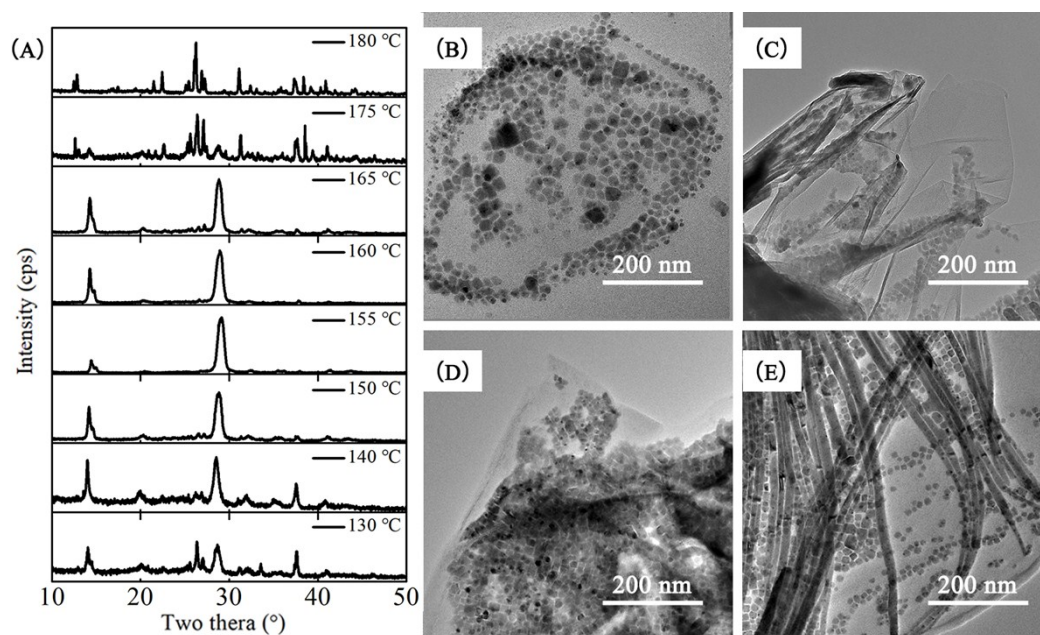

**Figure S4.** Structure and morphology of  $\gamma$ -CsPbI<sub>3</sub> NCs/rGO heterostructures with varying synthesis temperatures. (A) XRD patterns of  $\gamma$ -CsPbI<sub>3</sub> NCs/rGO heterostructures with varying synthesis temperatures ranging from 130 to 140, 150, 155, 160, 165, 175, and 180 °C. (B-E) TEM images of  $\gamma$ -CsPbI<sub>3</sub> NCs/rGO heterostructures with the synthesis temperatures of (B) 140, (C) 150, (D) 155, and (E) 175 °C. The optimized synthesis temperature were controlled between 150 and 165 °C.

Furthermore, synthesis temperature could obviously adjust these active precursors amounts, thus dominating the formation and quality of  $\gamma$ -CsPbI<sub>3</sub> NCs. The structure and morphology of  $\gamma$ -CsPbI<sub>3</sub> NCs/rGO heterostructures were also controlled by synthesis temperatures, as shown in **Figure S4**. When the synthesis temperature were controlled between 150 and 165 °C,  $\gamma$ -CsPbI<sub>3</sub> NCs/rGO heterostructures could obtain a high quality of  $\gamma$ -CsPbI<sub>3</sub> NCs, thus benefiting for improving their phase stability and optoelectronic properties.

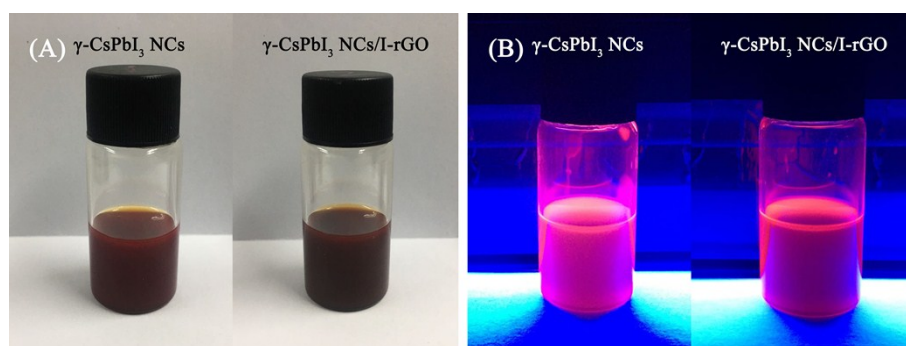

**Figure S5.** Samples of  $\gamma$ -CsPbI<sub>3</sub> NCs and  $\gamma$ -CsPbI<sub>3</sub> NCs/I-rGO in n-hexane under ambient and UV light.

**Table S2.** Morphology parameters derived from the corresponding TEM and HRTEM images of  $\gamma$ -CsPbI<sub>3</sub> NCs/*x*-rGO heterostructure films with varying rGO concentrations from 0 to 0.5 g·L<sup>-1</sup>.

|                                          | Lattice fringes, Å | Average crystal size, nm |
|------------------------------------------|--------------------|--------------------------|
| $\gamma$ -CsPbI <sub>3</sub> NCs         | 3.21               | 10.05                    |
| $\gamma$ -CsPbI <sub>3</sub> NCs/0.1-rGO | 3.24               | 11.25                    |
| $\gamma$ -CsPbI <sub>3</sub> NCs/0.2-rGO | 3.26               | 12.12                    |
| $\gamma$ -CsPbI <sub>3</sub> NCs/0.3-rGO | 3.27               | 12.56                    |
| $\gamma$ -CsPbI <sub>3</sub> NCs/0.4-rGO | 3.29               | 13.00                    |
| $\gamma$ -CsPbI <sub>3</sub> NCs/0.5-rGO | 3.32               | 16.81                    |

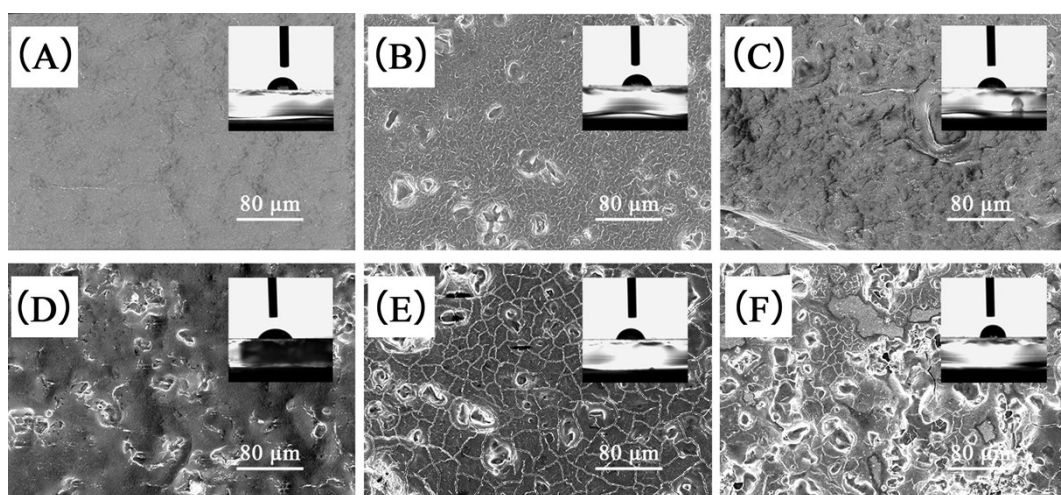

**Figure S6.** FE-SEM of  $\gamma$ -CsPbI<sub>3</sub> NCs/*x*-rGO heterostructures films with varying rGO concentrations of (A) 0, (B) 0.1, (C) 0.2, (D) 0.3, (E) 0.4 and (F) 0.5g·L<sup>-1</sup>. The insets in **Figure S5(A-F)** show the contact angle of deionized water on the surface of  $\gamma$ -CsPbI<sub>3</sub> NCs/*x*-rGO heterostructure films. The corresponding contact angle range from 76.52 ° to 74.17 °, 70.31 °, 57.58 °, 73.47 ° and 87.99 °, respectively. With the increase of rGO concentration, small hole and crackle appeared on the surface of films and thus decreasing their contact angle. However, when rGO concentration exceed 0.4 g·L<sup>-1</sup>, the film quality was serious degraded and excess rGO exposed to the surface of films and thus increasing their contact angle.

**Table S3.** Structural parameters derived from the corresponding XRD patterns of  $\gamma$ -CsPbI<sub>3</sub> NCs/*x*-rGO heterostructure films with varying rGO concentrations from 0 to 0.5 g·L<sup>-1</sup>, and stored in ambient conditions (room temperature of 25 °C and a humidity of 25% RH conditions) for 0 and 4 weeks without encapsulation. The crystal sizes of  $\gamma$ -CsPbI<sub>3</sub> NCs are calculated by Debye-Scherrer equation. (Instrument correction value for instrumental broadening changes =0.1252 °)

|                                          | XRD (0 week)                   |                                             |                             | XRD (4 weeks)                  |                                             |                             |
|------------------------------------------|--------------------------------|---------------------------------------------|-----------------------------|--------------------------------|---------------------------------------------|-----------------------------|
|                                          | Peak position of (040) Peak, ° | Full width at half maximum of (040) Peak, ° | Calculated crystal size, nm | Peak position of (040) Peak, ° | Full width at half maximum of (040) Peak, ° | Calculated crystal size, nm |
| $\gamma$ -CsPbI <sub>3</sub> NCs         | 28.57                          | 0.87                                        | 10.64                       | -                              | -                                           | -                           |
| $\gamma$ -CsPbI <sub>3</sub> NCs/0.1-rGO | 28.56                          | 0.80                                        | 11.76                       | 28.45                          | 0.60                                        | 16.62                       |
| $\gamma$ -CsPbI <sub>3</sub> NCs/0.2-rGO | 28.50                          | 0.79                                        | 11.83                       | 28.44                          | 0.74                                        | 12.83                       |
| $\gamma$ -CsPbI <sub>3</sub> NCs/0.3-rGO | 28.49                          | 0.76                                        | 12.38                       | 28.43                          | 0.75                                        | 12.61                       |
| $\gamma$ -CsPbI <sub>3</sub> NCs/0.4-rGO | 28.48                          | 0.74                                        | 12.90                       | 28.41                          | 0.70                                        | 13.84                       |
| $\gamma$ -CsPbI <sub>3</sub> NCs/0.5-rGO | 28.48                          | 0.60                                        | 16.80                       | -                              | -                                           | -                           |

**Table S4.** Optoelectronic parameters derived from the corresponding steady-state PL spectra and

time-resolved PL spectra of  $\gamma$ -CsPbI<sub>3</sub> NCs/x-rGO heterostructures films with varying rGO concentrations from 0 to 0.5 g·L<sup>-1</sup>. Time-resolved PL spectra of  $\gamma$ -CsPbI<sub>3</sub> NCs/x-rGO heterostructures were stored in ambient conditions for 0 and 4 weeks without encapsulation.

|                                          | Steady-state PL   | Time-resolved PL (0 week) |               |               |                    | Time-resolved PL (4 weeks) |               |               |                    |
|------------------------------------------|-------------------|---------------------------|---------------|---------------|--------------------|----------------------------|---------------|---------------|--------------------|
|                                          | Peak Position, nm | $\tau_1$ , ns             | $\tau_2$ , ns | $\tau_3$ , ns | $\tau_{aver}$ , ns | $\tau_1$ , ns              | $\tau_2$ , ns | $\tau_3$ , ns | $\tau_{aver}$ , ns |
| $\gamma$ -CsPbI <sub>3</sub> NCs         | 706.00            | 10.09                     | 29.59         | 104.92        | 32.10              | -                          | -             | -             | -                  |
| $\gamma$ -CsPbI <sub>3</sub> NCs/0.1-rGO | 695.00            | 11.77                     | 43.07         | 122.60        | 55.27              | 9.53                       | 10.00         | 99.41         | 40.09              |
| $\gamma$ -CsPbI <sub>3</sub> NCs/0.2-rGO | 688.00            | 12.29                     | 45.28         | 125.48        | 67.77              | 10.93                      | 39.01         | 111.17        | 49.39              |
| $\gamma$ -CsPbI <sub>3</sub> NCs/0.3-rGO | 688.00            | 23.93                     | 65.07         | 185.98        | 68.30              | 17.87                      | 51.97         | 181.67        | 58.61              |
| $\gamma$ -CsPbI <sub>3</sub> NCs/0.4-rGO | 686.00            | 10.25                     | 38.67         | 130.22        | 51.40              | 7.68                       | 29.21         | 111.40        | 33.89              |
| $\gamma$ -CsPbI <sub>3</sub> NCs/0.5-rGO | 683.00            | 9.06                      | 36.96         | 97.18         | 44.35              | 4.02                       | 20.31         | 73.43         | 17.72              |

**Table S5.** PLQYs of  $\gamma$ -CsPbI<sub>3</sub> NCs/x-rGO heterostructures films with varying rGO concentrations from 0 to 0.5 g·L<sup>-1</sup>, and stored in ambient conditions for 4 weeks without encapsulation.

|                                          | 0 week, % | 1 week, % | 2 weeks, % | 3 weeks, % | 4 weeks, % |
|------------------------------------------|-----------|-----------|------------|------------|------------|
| $\gamma$ -CsPbI <sub>3</sub> NCs         | 11.22     | 6.11      | 3.53       | 0.86       | 0.18       |
| $\gamma$ -CsPbI <sub>3</sub> NCs/0.1-rGO | 11.01     | 6.86      | 3.92       | 3.22       | 1.57       |
| $\gamma$ -CsPbI <sub>3</sub> NCs/0.2-rGO | 10.74     | 10.22     | 9.43       | 8.34       | 7.28       |
| $\gamma$ -CsPbI <sub>3</sub> NCs/0.3-rGO | 10.50     | 10.13     | 9.78       | 9.12       | 8.27       |
| $\gamma$ -CsPbI <sub>3</sub> NCs/0.4-rGO | 9.48      | 8.36      | 7.28       | 4.27       | 3.56       |
| $\gamma$ -CsPbI <sub>3</sub> NCs/0.5-rGO | 8.76      | 5.21      | 3.83       | 1.34       | 0.7        |
